# Supplementary material for: Functional balance training in people with Parkinson’s disease: a protocol of balanceHOME randomized control trial with crossover
Source: Frontiers journal article supplement (doi:10.3389/fnagi.2023.1137360), 2023-04-26
Supplement: Data_Sheet_4.pdf [file Data_Sheet_4.pdf]

**Standardized neurological clinical interview for Parkinson's disease****Personal data:****Code:**

|                                                                                                                                                                                                                                                                                                                             |                                                                                                                                                                                                                                                          |
|-----------------------------------------------------------------------------------------------------------------------------------------------------------------------------------------------------------------------------------------------------------------------------------------------------------------------------|----------------------------------------------------------------------------------------------------------------------------------------------------------------------------------------------------------------------------------------------------------|
| Birthdate:                                                                                                                                                                                                                                                                                                                  | Sex: <input type="checkbox"/> Woman <input type="checkbox"/> Man                                                                                                                                                                                         |
| Dominance: <input type="checkbox"/> Right-handed <input type="checkbox"/> Left-handed<br><input type="checkbox"/> Ambidextrous                                                                                                                                                                                              | Civil status: <input type="checkbox"/> Single <input type="checkbox"/> Married <input type="checkbox"/> Couple<br><input type="checkbox"/> Separated <input type="checkbox"/> Divorced <input type="checkbox"/> Widowed                                  |
| Lives with: <input type="checkbox"/> Partner <input type="checkbox"/> Children <input type="checkbox"/> Partner and child/ren <input type="checkbox"/> Alone <input type="checkbox"/> Others                                                                                                                                | Academic level:<br><input type="checkbox"/> No studies <input type="checkbox"/> Primary<br><input type="checkbox"/> Secondary <input type="checkbox"/> High school<br><input type="checkbox"/> Professional training <input type="checkbox"/> University |
| Current occupation:<br><input type="checkbox"/> Professional <input type="checkbox"/> Retired by age<br><input type="checkbox"/> Trade job <input type="checkbox"/> Retired due to illness<br><input type="checkbox"/> Work at home <input type="checkbox"/> Unemployed                                                     | Specify formation:<br><br>Specify year of retirement (if applicable):                                                                                                                                                                                    |
| Specify type of current or previously performed work (and number of years):                                                                                                                                                                                                                                                 |                                                                                                                                                                                                                                                          |
| Smoking habit:<br><input type="checkbox"/> Do smoke, daily<br><input type="checkbox"/> Do smoke, not daily<br><input type="checkbox"/> Does not currently smoke, but has smoked before<br><input type="checkbox"/> Does not smoke, nor has ever smoked regularly                                                            | Alcohol (specify amount):<br><input type="checkbox"/> Every day<br><input type="checkbox"/> Some day a week<br><input type="checkbox"/> Some day a month<br><input type="checkbox"/> Do not consume alcohol                                              |
| Physical activity level: (specify activity and amount)<br><input type="checkbox"/> Completely inactive (read, TV...)<br><input type="checkbox"/> Occasional physical or sporting activity (walking, gardening, cycling, gymnastics...)<br><input type="checkbox"/> Regular physical activity (walking, tennis, swimming...) |                                                                                                                                                                                                                                                          |
| Intellectual activity level: (specify activity and amount)<br><input type="checkbox"/> Completely inactive<br><input type="checkbox"/> Occasional intellectual activity<br><input type="checkbox"/> Regular intellectual activity                                                                                           |                                                                                                                                                                                                                                                          |
| Has COVID-19 passed? (when, severity of symptoms, duration)<br><input type="checkbox"/> Yes<br><input type="checkbox"/> No                                                                                                                                                                                                  |                                                                                                                                                                                                                                                          |
| Have you been vaccinated against COVID-19? (when, vaccine)<br><input type="checkbox"/> Yes<br><input type="checkbox"/> No                                                                                                                                                                                                   |                                                                                                                                                                                                                                                          |

**Parkinson start and history:**

|                                                                                                                                                                                                                                     |                                                |
|-------------------------------------------------------------------------------------------------------------------------------------------------------------------------------------------------------------------------------------|------------------------------------------------|
| Year of diagnosis of Parkinson's disease:                                                                                                                                                                                           | Evolution in years to the current date:        |
| Family history: <input type="checkbox"/> no history <input type="checkbox"/> mother <input type="checkbox"/> father <input type="checkbox"/> both parents <input type="checkbox"/> sibling/s <input type="checkbox"/> grandfather/s |                                                |
| Other diagnoses (specify date):                                                                                                                                                                                                     |                                                |
| Parkinsonian medication, time taken and amount (mg):                                                                                                                                                                                | Other medications, time taken and amount (mg): |

|                                                                                                                                                                                                                               |  |
|-------------------------------------------------------------------------------------------------------------------------------------------------------------------------------------------------------------------------------|--|
|                                                                                                                                                                                                                               |  |
| Physiotherapy (where?): <input type="checkbox"/> not performed <input type="checkbox"/> 1 time/week <input type="checkbox"/> 2 times/week <input type="checkbox"/> 3 times/week <input type="checkbox"/> 4 or more times/week |  |
| Other therapies (which ones and frequency):                                                                                                                                                                                   |  |

**Parkinsonian signs:**

|                                                                                                                                                                                                       |                  |
|-------------------------------------------------------------------------------------------------------------------------------------------------------------------------------------------------------|------------------|
| Hoehn and Yarh Stadium:                                                                                                                                                                               | UPDRS III Score: |
| Predominance of signs: <input type="checkbox"/> Right hemibody <input type="checkbox"/> Left hemibody <input type="checkbox"/> Bilateral                                                              |                  |
| Side of the body where the signs first appear (specify):<br><input type="checkbox"/> Right hemibody <input type="checkbox"/> Left hemibody <input type="checkbox"/> Both                              |                  |
| Rest tremor: <input type="checkbox"/> Right hemibody <input type="checkbox"/> Left hemibody <input type="checkbox"/> Both<br><input type="checkbox"/> Upper limb <input type="checkbox"/> Lower limb  |                  |
| Bradykinesia: <input type="checkbox"/> Right hemibody <input type="checkbox"/> Left hemibody <input type="checkbox"/> Both<br><input type="checkbox"/> Upper limb <input type="checkbox"/> Lower limb |                  |
| Stiffness: <input type="checkbox"/> Right hemibody <input type="checkbox"/> Left hemibody <input type="checkbox"/> Both<br><input type="checkbox"/> Upper limb <input type="checkbox"/> Lower limb    |                  |
| Postural alteration:<br><input type="checkbox"/> Positive destabilization test <input type="checkbox"/> Romberg + eyes open <input type="checkbox"/> Romberg + eyes closed                            |                  |
| Other signs:                                                                                                                                                                                          |                  |
| MMII length: <u>cm right</u> <u>cm left</u>                                                                                                                                                           |                  |
| Number of falls in the last month:                                                                                                                                                                    |                  |

**Comments/others:**


---



---



---



---



---



---



---

**Inclusion/exclusion criteria:**

|                                                                                                                     |                                                          |
|---------------------------------------------------------------------------------------------------------------------|----------------------------------------------------------|
| <i>Inclusion criteria:</i>                                                                                          |                                                          |
| PD diagnosis                                                                                                        | <input type="checkbox"/> Yes <input type="checkbox"/> No |
| H&Y Stadium between I and IV                                                                                        | <input type="checkbox"/> Yes <input type="checkbox"/> No |
| Independent walking with or without technical assistance                                                            | <input type="checkbox"/> Yes <input type="checkbox"/> No |
| Stable parkinsonian medication last month                                                                           | <input type="checkbox"/> Yes <input type="checkbox"/> No |
| <i>Exclusion criteria:</i>                                                                                          |                                                          |
| Presence of other diseases that affect balance or gait                                                              | <input type="checkbox"/> Yes <input type="checkbox"/> No |
| Other diagnosed neurological pathologies                                                                            | <input type="checkbox"/> Yes <input type="checkbox"/> No |
| Uncontrolled chronic diseases                                                                                       | <input type="checkbox"/> Yes <input type="checkbox"/> No |
| Participate in another physical rehabilitation program during the intervention period or 1 month before starting it | <input type="checkbox"/> Yes <input type="checkbox"/> No |
| Not mastering one of the two official languages of the Valencian Community                                          | <input type="checkbox"/> Yes <input type="checkbox"/> No |
